# Supplementary material for: New Insights in the Occurrence of Venous Thromboembolism in Critically Ill Patients with COVID-19—A Large Postmortem and Clinical Analysis
Source: MDPI journal article supplement (doi:10.3390/v14040811), 2022-04-14
Supplement: s1 [file s1]

Supplementary Table S1: Baseline characteristics of age- and sex-matched COVID-19 (n=21) and non-COVID-19 (n=21) patients from intensive care units all over the city of Hamburg, autopsied at the Institute of Legal Medicine (University Medical Center Hamburg-Eppendorf, Germany), are illustrated. Patients were included from consecutive cohorts of COVID-19 patients between January 1st, 2020, until December 31st, 2020, and non-COVID-19 patients between January 1st, 2019, until February 29th, 2020. Numbers with frequencies and median with interquartile ranges are illustrated. Abbreviations: ICU, intensive care unit; BMI, body mass index; MV, mechanical ventilation; RRT, renal replacement therapy; ECMO, extracorporeal membrane oxygenation.

|              | <b>Non-COVID-19<br/>ICU patients<br/>n = 21</b> | <b>COVID-19<br/>ICU patients<br/>n = 21</b> | <b>Overall patients<br/>n = 42</b> |
|--------------|-------------------------------------------------|---------------------------------------------|------------------------------------|
|              | Sociodemographic variables                      |                                             |                                    |
| Age          | 74.0 (57.0-81.0)                                | 74.0 (57.0-81.0)                            | 74.0 (57.0-81.0)                   |
| Sex          |                                                 |                                             |                                    |
| Female       | 3 (14.3%)                                       | 3 (14.3%)                                   | 6 (14.3%)                          |
| Male         | 18 (85.7%)                                      | 18 (85.7%)                                  | 36 (85.7%)                         |
| BMI          | 28.0 (24.0-30.0)                                | 28.7 (27.3-33.3)                            | 28.3 (24.0-32.0)                   |
|              | ICU related therapy                             |                                             |                                    |
| MV           | 20 (95.2%)                                      | 16 (76.2%)                                  | 36 (85.7%)                         |
| RRT          | 7 (33.3%)                                       | 8 (38.1%)                                   | 15 (35.7%)                         |
| ECMO         | 1 (4.8%)                                        | 2 (9.5%)                                    | 3 (7.1%)                           |
|              | Deep vein thrombosis                            |                                             |                                    |
| Not examined | 18 (85.7%)                                      | 7 (33.3%)                                   | 25 (59.5%)                         |
| 0            | 3 (14.3%)                                       | 7 (33.3%)                                   | 10 (23.8%)                         |
| 1            | 0 (0.0%)                                        | 7 (33.3%)                                   | 7 (16.7%)                          |
|              | Pulmonary embolisms                             |                                             |                                    |
| 0            | 21 (100.0%)                                     | 12 (57.1%)                                  | 33 (78.6%)                         |
| 1            | 0 (0.0%)                                        | 9 (42.9%)                                   | 9 (21.4%)                          |
